# Supplementary material for: Anti-obesity effects of a standardized ethanol extract of Eisenia bicyclis by regulating the AMPK signaling pathway in 3T3-L1 cells and HFD-induced mice
Source: Royal Society of Chemistry journal article supplement (doi:10.1039/d4fo00759j), 2024-01-01
Supplement: d4fo00759j1.pdf [file d4fo00759j1.pdf]

## Supplementary Data

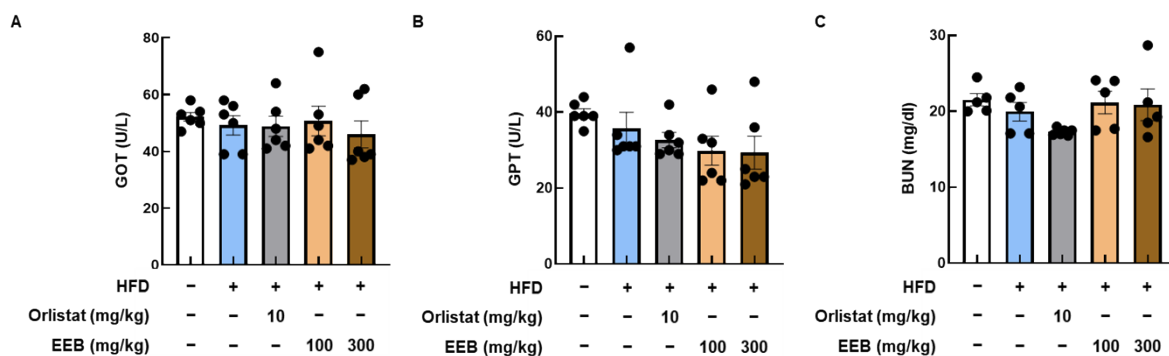

**Supplementary Figure 1.** Effects of oral administration of EEB on liver and renal function in plasma of HFD-induced C57BL/6J mice. (A) GOT, (B) GPT, and (C) BUN in plasma were analyzed. Values are expressed as means  $\pm$  SEM ( $n = 5\sim 6$ ). # $p < 0.05$  vs. normal diet-fed control group.
