# Supplementary figures and images for: Anti-obesity effects of a standardized ethanol extract of Eisenia bicyclis by regulating the AMPK signaling pathway in 3T3-L1 cells and HFD-induced mice
Source: Royal Society of Chemistry journal article supplement (doi:10.1039/d4fo00759j), 2024-01-01

A

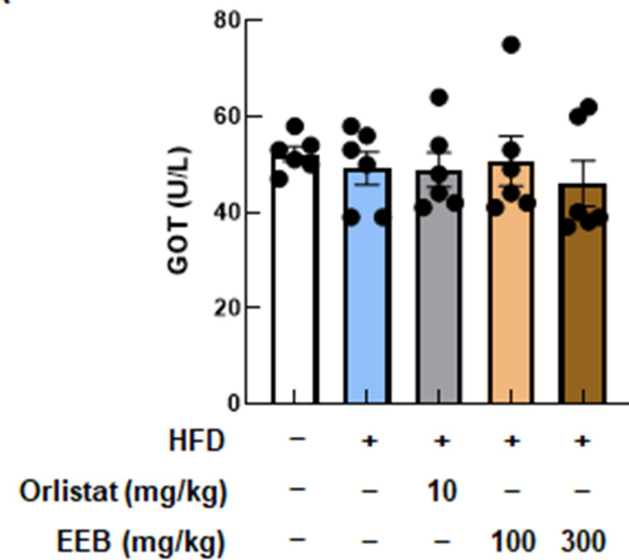

B

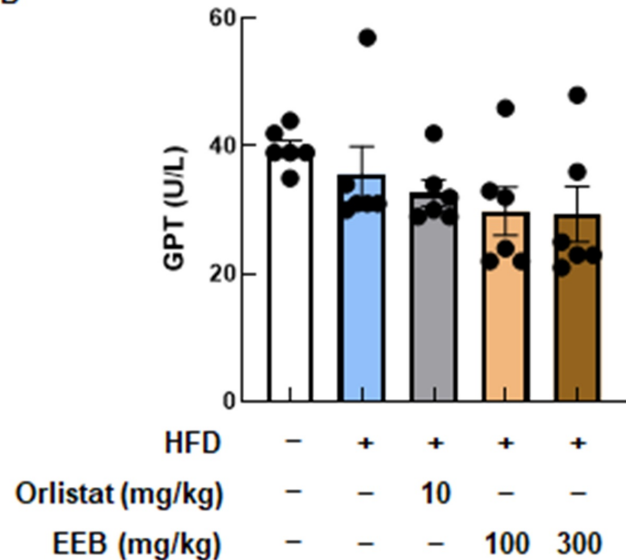

C

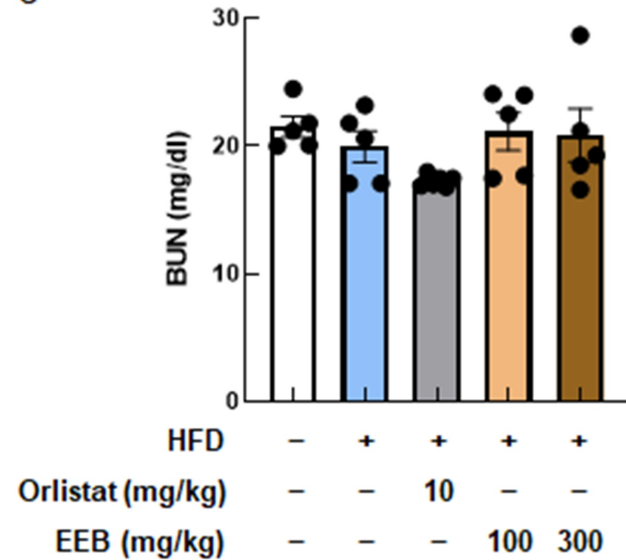

Supplement: d4fo00759j3.pdf [file d4fo00759j3.pdf]
